# Supplementary material
Source: PubMed Central journal article supplement (PMC4836434)
Supplement: AEM.03529-15_zam999117109so1.pdf [file AEM.03529-15_zam999117109so1.pdf]

# **SUPPLEMENTARY MATERIAL**

## **Characterization of biofilms developing on hospital shower hoses and implications for nosocomial infections**

Maria J. Soto-Giron, Luis M. Rodriguez-R, Chengwei Luo, Michael Elk, Hodon Ryu, Jill Hoelle, Jorge W. Santo Domingo, Konstantinos T. Konstantinidis

**Table S1.** General statistics of five biofilm metagenomes from the shower hoses

|                                      | Sample |        |        |        |        |
|--------------------------------------|--------|--------|--------|--------|--------|
|                                      | M1     | M3     | M4     | M5     | M6     |
| <b>Assembly</b>                      |        |        |        |        |        |
| No. of reads (millions)              | 18.01  | 14.96  | 29.48  | 37.03  | 23.43  |
| No. of contigs*                      | 15,323 | 2,878  | 9,394  | 18,311 | 21,910 |
| N50 of contigs (b)                   | 3,242  | 19,478 | 6,469  | 7,483  | 6,226  |
| Average size (Mb)                    | 34.86  | 15.95  | 25.23  | 58.99  | 51.11  |
| No. of predicted genes               | 45,366 | 17,676 | 31,656 | 70,196 | 64,737 |
| <b>Taxonomy classification** (%)</b> |        |        |        |        |        |
| <i>Mycobacterium</i>                 | 45.3   | 58.5   | 52.5   | 26.3   | 30     |
| <i>Erythrobacter</i>                 | 13.8   | 6.71   | 9.94   | 9.6    | 5.81   |
| <i>Sphingomonas</i>                  | 3.87   | 6.34   | 10.7   | 6.41   | 6.24   |
| <i>Novosphingobium</i>               | 3.83   | 5.99   | 5.4    | 3.65   | 2.06   |
| <i>Bradyrhizobium</i>                | 2.66   | 0.22   | 0.18   | 15.45  | 8.24   |
| <i>Citromicrobium</i>                | 2.09   | 2.02   | 1.73   | 1.47   | 1.02   |
| <i>Sphingobium</i>                   | 1.41   | 6      | 8.98   | 2.28   | 2.21   |

\*Contigs longer than 5000 bases were counted.

\*\* Relative abundance of taxa at genus level based on annotated proteins recovered in each sample and classified by MyTaxa.

**Table S2.** Statistics of the 94 isolate genomes recovered from the shower hose biofilms.

| Isolate ID | OTU designation               | Identity (%) | GG content (%) | Assembly size (Mb) | No of contigs | No of protein-coding genes |
|------------|-------------------------------|--------------|----------------|--------------------|---------------|----------------------------|
| CCH3-A3    | <i>Blastomonas</i>            | 100          | 64.24          | 4.34               | 162           | 4,238                      |
| CCH9-F3    | <i>Blastomonas</i>            | 100          | 64.26          | 4.18               | 154           | 4,078                      |
| CCH6-A6    | <i>Blastomonas</i>            | 100          | 64.16          | 4.39               | 169           | 4,301                      |
| CCH8-E1    | <i>Blastomonas</i>            | 100          | 64.33          | 4.27               | 145           | 4,167                      |
| CCH10-E1   | <i>Blastomonas</i>            | 100          | 64.18          | 4.35               | 230           | 4,292                      |
| CCH9-A1    | <i>Blastomonas</i>            | 100          | 64.19          | 4.20               | 95            | 4,083                      |
| CCH13-E1   | <i>Blastomonas</i>            | 97.4         | 64.2           | 4.36               | 159           | 4,265                      |
| CCH2-E1    | <i>Blastomonas</i>            | 100          | 64.24          | 4.40               | 164           | 4,344                      |
| CCH4-A2    | <i>Acidovorax delafieldii</i> | 100          | 64.29          | 4.28               | 192           | 4,155                      |
| CCH5-A5    | <i>Sphingomonas</i>           | 98.2         | 66.88          | 3.55               | 81            | 3,410                      |
| CCH3-E3    | <i>Blastomonas</i>            | 100          | 64.27          | 4.35               | 153           | 4,256                      |
| CCH8-A3    | <i>Blastomonas</i>            | 100          | 64.11          | 4.57               | 217           | 4,567                      |
| CCH18-B1   | <i>Sphingomonas</i>           | 99.7         | 64.23          | 4.32               | 173           | 4,198                      |
| CCH7-E1    | <i>Blastomonas</i>            | 100          | 64.18          | 4.19               | 111           | 4,067                      |
| CCH15-G10  | <i>Blastomonas</i>            | 100          | 64.22          | 4.35               | 192           | 4,300                      |
| CCH6-E2    | <i>Blastomonas</i>            | 100          | 64.07          | 4.49               | 1088          | 5,127                      |
| CCH13-A3   | <i>Blastomonas</i>            | 100          | 64.23          | 4.33               | 148           | 4,197                      |
| CCH21-G11  | <i>Sphingomonas</i>           | 99.8         | 66.73          | 3.65               | 59            | 3,483                      |
| CCH5-E3    | <i>Blastomonas</i>            | 100          | 64.31          | 4.3                | 189           | 4,254                      |
| CCH4-D12   | <i>Blastomonas</i>            | 100          | 64.29          | 4.28               | 173           | 4,148                      |
| CCH12-A3   | <i>Novosphingobium</i>        | 100          | 63.27          | 5.48               | 328           | 5,404                      |
| CCH3-A5    | <i>Rhizobiales</i>            | 99.7         | 66.5           | 5.10               | 208           | 5,042                      |
| CCH5-F6    | <i>Bradyrhizobium</i>         | 99.7         | 64.12          | 8.15               | 206           | 7,766                      |
| CCH12-B7   | <i>Dermaococcus</i>           | 99.8         | 67.66          | 4.75               | 279           | 4,559                      |
| CCH16-     | <i>Sphingomonas</i>           |              | 66.85          | 3.56               | 74            |                            |

|           |                                   |      |       |      |     |       |
|-----------|-----------------------------------|------|-------|------|-----|-------|
| B10       |                                   | 99.8 |       |      |     | 3,386 |
| CCH9-G4   | <i>Pseudoxanthomonas mexicana</i> | 99.8 | 66.55 | 3.98 | 105 | 3,718 |
| CCH10-E5  | <i>Rhizobiales</i>                | 99.6 | 67.66 | 5.32 | 252 | 5,333 |
| CCH3-G3   | <i>Acidovorax delafieldii</i>     | 100  | 64.78 | 5.79 | 634 | 5,698 |
| CCH6-A11  | <i>Sphingomonas</i>               | 100  | 68.67 | 3.87 | 261 | 3,839 |
| CCH6-A12  | <i>Neisseria perflava</i>         | 100  | 41.73 | 2.18 | 105 | 2,121 |
| CCH10-B3  | <i>Sphingomonas</i>               | 99.8 | 65.15 | 3.83 | 98  | 3,779 |
| CCH9-A3   | <i>Rhizobiales</i>                | 99.7 | 67.34 | 5.69 | 281 | 5,658 |
| CCH4-E10  | <i>Chryseobacterium</i>           | 100  | 36.66 | 4.41 | 195 | 4,120 |
| CCH4-A6   | <i>Bradyrhizobiaceae</i>          | 99.8 | 60.89 | 5.28 | 159 | 5,103 |
| CCH10-C7  | <i>Bradyrhizobiaceae</i>          | 99.8 | 60.72 | 5.60 | 201 | 5,427 |
| CCH5-A3   | <i>Blastomonas</i>                | 100  | 64.26 | 4.43 | 132 | 4,334 |
| CCH19-E1  | <i>Porphyrobacter donghaensis</i> | 100  | 64.32 | 3.96 | 237 | 3,914 |
| CCH12-A10 | <i>Comamonadaceae</i>             | 100  | 63.34 | 4.87 | 470 | 4,791 |
| CCH7-A10  | <i>Porphyrobacter donghaensis</i> | 100  | 51.11 | 2.52 | 564 | 2,521 |
| CCH1-A6   | <i>Blastomonas</i>                | 100  | 64.37 | 4.80 | 168 | 4,740 |
| CCH10-H12 | <i>Neisseria perflava</i>         | 100  |       |      |     | 2,495 |
| CCH4-C5   | <i>Comamonadaceae</i>             | 100  | 63.19 | 4.61 | 456 | 4,509 |
| CCH4-E1   | <i>Caulobacter</i>                | 99.8 | 66.39 | 4.12 | 216 | 4,128 |
| CCH5-D3   | <i>Streptococcus</i>              | 99.8 | 39.94 | 2.23 | 102 | 2,099 |
| CCH5-D2   | <i>Methylobacterium</i>           | 99.8 | 71.09 | 6.09 | 420 | 6,144 |
| CCH1-B1   | <i>Bradyrhizobiaceae</i>          | 99.7 | 67.36 | 5.81 | 302 | 5,764 |
| CCH8-H5   | <i>Streptococcus</i>              | 100  | 39.8  | 2.20 | 105 | 2,105 |
| CCH9-E1   | <i>Caulobacter</i>                | 99.8 | 67.66 | 4.73 | 260 | 4,521 |
| CCH3-A4   | <i>Porphyrobacter donghaensis</i> | 100  |       |      |     | 4,162 |
| CCH20-B6  | <i>Sphingomonas</i>               | 99.8 | 66.58 | 4.16 | 236 | 3,963 |
| CCH5-E12  | <i>Sphingomonas</i>               | 99.5 | 66.62 | 4.08 | 100 | 4,741 |
| CCH8-G7   | <i>Caulobacter</i>                |      | 66.74 | 4.95 | 189 |       |
| CCH8-G7   | <i>Streptococcus</i>              | 99.3 | 40.43 | 2.24 | 81  | 2,215 |
| CCH9-H8   | <i>Sphingomonas</i>               | 99.2 | 66.06 | 4.57 | 220 | 4,529 |

|         |                           |      |       |      |     |       |
|---------|---------------------------|------|-------|------|-----|-------|
| CCH7-A1 | <i>Porphyrobacter</i>     | 100  | 64.23 | 4.41 | 182 | 4,351 |
|         | <i>Xylophilus</i>         | 100  |       |      |     | 6,056 |
| CCH5-B3 | <i>ampelinus</i>          |      | 68.27 | 6.21 | 320 |       |
| CCH9-H3 | <i>Phenylobacterium</i>   | 99.2 | 69.48 | 5.62 | 149 | 5,528 |
|         | <i>Porphyrobacter</i>     | 99.8 |       |      |     | 4,178 |
| CCH1-A1 | <i>donghaensis</i>        |      | 66.77 | 4.21 | 215 |       |
|         | <i>Porphyrobacter</i>     | 100  |       |      |     | 5,127 |
| CCH6-E1 | <i>donghaensis</i>        |      | 66.45 | 4.28 | 275 |       |
| CCH5-A9 | <i>Bosea</i>              | 99.2 | 67.39 | 5.65 | 278 | 5,628 |
| CCH9-E2 | <i>Sphingomonas</i>       | 99.2 | 66.09 | 4.31 | 203 | 4,260 |
| CCH8-C6 | <i>Streptococcus</i>      | 100  | 43.37 | 2.21 | 107 | 2,205 |
| CCH9-F2 | <i>Sphingomonas</i>       | 100  | 68.51 | 4.08 | 261 | 4,082 |
| CCH6-A4 | <i>Rhizobiales</i>        | 99.5 | 66.82 | 6.25 | 380 | 6,339 |
|         | <i>Porphyrobacter</i>     | 100  |       |      |     | 4,449 |
| CCH8-A2 | <i>donghaensis</i>        |      | 66.47 | 4.33 | 274 |       |
| CCH8-D1 | <i>Rhizobiales</i>        | 99.7 | 66.78 | 6.16 | 295 | 6,160 |
| CCH17-  | <i>Porphyrobacter</i>     | 100  |       |      |     | 4,136 |
| B8      | <i>donghaensis</i>        |      | 66.58 | 4.17 | 223 |       |
| CCH2-D9 | <i>Dermacoccus</i>        | 99.7 | 69.19 | 3.01 | 58  | 2,733 |
| CCH12-  | <i>Porphyrobacter</i>     | 100  |       |      |     | 6,291 |
| G6      | <i>donghaensis</i>        |      | 66.92 | 6.13 | 454 |       |
| CCH11-  |                           | 99.7 |       |      |     | 6,181 |
| D2      | <i>Rhizobiales</i>        |      | 66.91 | 6.12 | 340 |       |
| CCH5-D1 | <i>Microbacterium</i>     | 100  | 68.25 | 4.01 | 110 | 3,918 |
| CCH2-A4 | <i>Rhizobiales</i>        | 99.7 | 66.86 | 6.17 | 350 | 6,246 |
| CCH11-  |                           | 99.5 |       |      |     | 4,713 |
| B1      | <i>Sphingobium</i>        |      | 64    | 4.77 | 212 |       |
|         | <i>Porphyrobacter</i>     | 100  |       |      |     | 4,384 |
| CCH6-A1 | <i>donghaensis</i>        |      | 66.64 | 4.39 | 246 |       |
| CCH10-  | <i>Mycobacterium</i>      | 100  |       |      |     | 6,883 |
| A2      | <i>mucogenicum</i>        |      | 66.8  | 6.72 | 531 |       |
| CCH11-  |                           | 100  |       |      |     | 4,122 |
| A4      | <i>Blastomonas</i>        |      | 64.18 | 4.23 | 152 |       |
| CCH3-E2 | <i>Micrococcus luteus</i> | 100  | 73.18 | 2.51 | 237 | 2,369 |
| CCH19-  |                           | 99.8 |       |      |     | 3,819 |
| C6      | <i>Sphingomonas</i>       |      | 66.7  | 3.93 | 109 |       |
| CCH12-  |                           | 99.7 |       |      |     | 5,487 |
| B4      | <i>Phenylobacterium</i>   |      | 69.56 | 5.55 | 199 |       |
| CCH12-  |                           | 99.5 |       |      |     | 4,053 |
| C2      | <i>Erythrobacteraceae</i> |      | 63.86 | 4.18 | 124 |       |
| CCH15-  |                           | 99.8 |       |      |     | 4,236 |
| F11     | <i>Sphingomonas</i>       |      | 66.77 | 4.35 | 109 |       |
| CCH5-   |                           | 99.1 |       |      |     | 4,235 |
| D11     | <i>Sphingomonas</i>       |      | 65.55 | 4.44 | 116 |       |

|           |                                                |      |       |      |      |        |
|-----------|------------------------------------------------|------|-------|------|------|--------|
| CCH18-H6  | <i>Sphingomonas</i>                            | 99.8 | 66.66 | 4.22 | 107  | 4,108  |
| CCH5-H10  | <i>Rhodospirillaceae</i>                       | 99.7 | 66.24 | 6.05 | 240  | 5,941  |
| CCH2-A2   | <i>Blastomonas</i>                             | 100  | 64.26 | 4.41 | 180  | 4,357  |
| CCH12-A2  | <i>Mycobacterium mucogenicum</i>               | 100  | 66.84 | 6.65 | 370  | 6,653  |
|           | <i>Porphyrobacter donghaensis</i>              | 100  | 66.85 | 4.10 | 212  | 4,064  |
| CCH7-E3   | <i>Blastomonas</i>                             | 100  | 67.36 | 6.02 | 279  | 5,959  |
| CCH15-A1  | <i>Sphingomonas</i>                            | 99.2 | 67.87 | 5.11 | 3796 | 7,882  |
| CCH13-B11 | <i>Sphingomonas Porphyrobacter donghaensis</i> | 99.7 | 66.76 | 3.89 | 64   | 3,766  |
|           | <i>Corynebacterium durum</i>                   | 99.7 | 66.4  | 4.33 | 241  | 4,309  |
| CCH5-A1   | <i>Corynebacterium durum</i>                   | 99.3 | 49.23 | 4.69 | 3475 | 6,946  |
| CCH6-D9   | <i>Sphingomonas</i>                            | 99.8 | 66.77 | 9.82 | 5483 | 10,000 |
| CCH7-B2   |                                                | 100  |       |      |      |        |
| CCH15-E2  | <i>Porphyrobacter donghaensis</i>              |      | 57.23 | 6.21 | 251  | 6,054  |
| CCH12-A4  | <i>Blastomonas</i>                             | 100  | 63.77 | 9.12 | 592  | 5,487  |

**Table S3.** General statistics of the binned populations recovered from the shower hose biofilm metagenomes.

|                                 | <b>Binned population genomes</b>                                        |                                                                                |
|---------------------------------|-------------------------------------------------------------------------|--------------------------------------------------------------------------------|
|                                 | <i>Blastomonas</i> sp.                                                  | <i>Mycobacterium</i> sp.                                                       |
| Average sequencing depth        | 41.40                                                                   | 115.9                                                                          |
| Size of the genome (Mb)         | 7.36                                                                    | 6.4                                                                            |
| Completeness (%)                | 94.9                                                                    | 100                                                                            |
| Contamination (%)               | 39.3                                                                    | 2.0                                                                            |
| GC content (%)                  | 7.36                                                                    | 6.4                                                                            |
| Average nucleotide identity (%) | 84.2                                                                    | 85.9                                                                           |
| Virulence-associated genes*     | 0                                                                       | 15                                                                             |
| Antibiotic resistance profile   | Aminoglycoside,<br>polymyxin,<br>kanamycin,<br>macrolide,<br>bacitracin | Fluoroquinolone,<br>penicillin,<br>cephalosporin,<br>gentamicin,<br>Netilmicin |

\* BLASTp searches against the Virulence Factors of Pathogenic Bacteria (1) and PATRIC databases (2).

**Table S4.** Functional categories and relative abundance of protein sequences recovered from the biofilm metagenomes (assembled contigs) with similarities to the annotated proteins at UniProt database. Relative abundance was calculated as the number of metagenomic proteins annotated to a specific function divided by the total number of annotated proteins in the respective sample.



| UniProt<br>id | Name                                                | Gene Ontology                                      | Sample |      |      |      |      |
|---------------|-----------------------------------------------------|----------------------------------------------------|--------|------|------|------|------|
|               |                                                     |                                                    | M1     | M3   | M4   | M5   | M6   |
| Q50615        | PE-PGRS family protein PE_PGRS33                    | Possible role in virulence and antigenic variation | 0.23   | 0.01 | 0.48 | 0.21 | 0.18 |
| P50360        | Protein y4hP                                        | Transposase activity                               | 0.16   | 0.42 | 0.1  | 0.12 | 0.13 |
| Q79FV4        | pyridoxal phosphate-dependent protein               | Catalytic activity                                 | 0.12   | 0.17 | 0.15 | 0.09 | 0.09 |
| P0A690        | PE-PGRS family protein PE_PGRS46                    | Virulence and antigenic variation                  | 0.12   | 0.01 | 0.22 | 0.15 | 0.07 |
| Q10637        | PE-PGRS family protein PE_PGRS24                    | Virulence and antigenic variation                  | 0.12   | 0.27 | 0.24 | 0.12 | 0.11 |
| P35883        | Transposase for insertion element IS6120            | Transposase activity                               | 0.12   | 0.21 | 0.15 | 0.01 | 0.09 |
| O86034        | D-beta-hydroxybutyrate dehydrogenase                | Metabolic process                                  | 0.07   | 0.14 | 0.05 | 0.09 | 0.11 |
| P55501        | Uncharacterized protein y4jA/y4nE/y4sE              | Transposase activity                               | 0.06   | 0.14 | 0.03 | 0.07 | 0.06 |
| P08080        | Transposase for insertion element                   | Transposase activity                               | 0.04   | 0.14 | 0.01 | 0.12 | 0.14 |
| A5TY80        | Insertion element IS6110 protein                    | Transposase activity                               | 0.06   | 0.14 | 0.06 | 0.02 | 0.04 |
| Q2G6U3        | Protein translocase subunit SecA                    | Protein transport                                  | 0.03   | 0.14 | 0.05 | 0.09 | 0.07 |
| P17985        | Insertion element ISR1 protein A3                   | Transposase activity                               | 0.04   | 0.07 | 0.01 | 0.13 | 0.06 |
| P38054        | Cation efflux system protein CusA                   | Resistance to copper and silver                    | 0.06   | 0.13 | 0.12 | 0.09 | 0.08 |
| A1KQG0        | Phthioceranic/hydroxyphthioceranic acid synthase    | Drug target                                        | 0.2    | 0.01 | 0.12 | 0.1  | 0.07 |
| P72003        | Serine/threonine-protein kinase PknF                | Stress response                                    | 0.16   | 0.01 | 0.2  | 0.01 | 0.09 |
| O65934        | ABC transporter ATP-binding/permease protein Rv1747 | Required for virulence                             | 0.16   | 0.01 | 0.14 | 0.01 | 0.21 |
| P9WPS6        | Probable cation-transporting ATPase G               | Required for virulence                             | 0.14   | 0.01 | 0.01 | 0.01 | 0.01 |

|                                |                                                 |                                     |       |       |      |      |       |  |
|--------------------------------|-------------------------------------------------|-------------------------------------|-------|-------|------|------|-------|--|
| 1                              |                                                 |                                     |       |       |      |      |       |  |
| P96218                         | Glutamate synthase [NADPH]                      | Biosynthesis                        | 0.14  | 0.1   | 0.06 | 0.01 | 0.06  |  |
| P60230                         | Transposase for insertion element IS1081        | Transposition                       | 0.13  | 0.13  | 0.13 | 0.11 | 0.11  |  |
| Q02251                         | Mycocerosic acid synthase                       | Lipid metabolism                    | 0.13  | 0.01  | 0.05 | 0.01 | 0.05  |  |
| P9WPS2.1                       | Probable copper-exporting P-type ATPase V       | Required for virulence              | 0.13  | 0.01  | 0.01 | 0.01 | 0.01  |  |
| O53735                         | Putative membrane protein mmpL4                 | Growth                              | 0.13  | 0.07  | 0.12 | 0.01 | 0.01  |  |
| O53303                         | Putative alcohol dehydrogenase D                | Stress response                     | 0.12  | 0.2   | 0.13 | 0.01 | 0.01  |  |
| Q57307                         | Cholesterol oxidase                             | Required for virulence              | 0.12  | 0.07  | 0.09 | 0.01 | 0.01  |  |
| Q2G480                         | Phosphoenolpyruvate carboxykinase               | Biofilm formation                   | 0.043 | 0.1   | 0.12 | 0.01 | 0.01  |  |
| P55390                         | Probable cold shock protein y4cH                | Regulation of transcription         | 0.01  | 0.01  | 0.01 | 0.08 | 0.11  |  |
| Q5NRH4                         | Glutamine-fructose-6-phosphate aminotransferase | Biosynthetic process                | 0.01  | 0.001 | 0.09 | 0.08 | 0.07  |  |
| <b>Disinfectant mechanisms</b> |                                                 |                                     |       |       |      |      |       |  |
| Q9KU26                         | Extracellular polymeric substance               | Signal transducer activity          | 0.086 | 0.03  | 0.03 | 0.14 | 0.084 |  |
| P37578                         | 60 kDa chaperonin GroEL1                        | Protein refolding                   | 0.302 | 0.17  | 0.33 | 0.32 | 0.253 |  |
| L8F435                         | GDP-mannose 6-dehydrogenase AlgD                | Polysaccharide biosynthetic process | 0.014 | 0.42  | 0.01 | 0.01 | 0.01  |  |
| R4R145                         | Alginate biosynthesis protein AlgA              | Polysaccharide biosynthetic process | 0.000 | 0.01  | 0.02 | 0.01 | 0.011 |  |
| P04425                         | Glutathione synthetase gshB                     | Response to oxidative stress        | 0.043 | 0.07  | 0.1  | 0.1  | 0.095 |  |
| Q73VT8                         | Putative glutathione reductase gorA             | reductase activity                  | 0.014 | 0.03  | 0.02 | 0.01 | 0.011 |  |
| A0R692                         | DNA protection during starvation protein        | Response to stress                  | 0.331 | 0.001 | 0.38 | 0.42 | 0.242 |  |
| P52214                         | Thioredoxin reductase trxB                      | Oxidoreductase activity             | 0.475 | 0.56  | 0.58 | 0.5  | 0.442 |  |
| Q51506                         | Redox-sensitive transcriptional activator SoxR  | Response to oxidative stress        | 0.043 | 0.07  | 0.03 | 0.04 | 0.032 |  |

|        |                                                                                   |                                         |       |       |       |       |       |
|--------|-----------------------------------------------------------------------------------|-----------------------------------------|-------|-------|-------|-------|-------|
| P9WGE7 | Superoxide dismutase sodA                                                         | Response to oxidative stress            | 0.029 | 0.01  | 0.01  | 0.07  | 0.053 |
| Q1I657 | RNA polymerase sigma factor RpoS                                                  | Response to stress                      | 0.000 | 0.07  | 0.17  | 0.12  | 0.179 |
| P9WGE9 | Superoxide dismutase SodC                                                         | Response to oxidative stress            | 0.058 | 0.07  | 0.09  | 0.06  | 0.084 |
| P96273 | Exodeoxyribonuclease III protein XthA                                             | DNA repair                              | 0.000 | 0.14  | 0.12  | 0.18  | 0.168 |
| A0PSD2 | Hydrogen peroxide-inducible genes activator, OxyR                                 | Binding transcription factor activity   | 0.173 | 0.1   | 0.15  | 0.21  | 0.116 |
| A0QYP1 | Catalase-peroxidase katG                                                          | Response to oxidative stress            | 0.274 | 0.21  | 0.19  | 0.28  | 0.2   |
| Q9I6Z2 | Alkyl hydroperoxide reductase ahpF                                                | Response to reactive oxygen species     | 0.086 | 0.07  | 0.09  | 0.05  | 0.042 |
| P31224 | Multidrug efflux pump subunit AcrB                                                | Response to drug                        | 0.070 | 0.014 | 0.034 | 0.002 | 0.011 |
| P52599 | Probable multidrug resistance protein emrK                                        | Response to antibiotic                  | 0.070 | 0.029 | 0.034 | 0.001 | 0.011 |
| Q98D15 | Probable multidrug resistance protein NorM                                        | Drug transmembrane transporter activity | 0.070 | 0.014 | 0.017 | 0.001 | 0.021 |
| P52002 | Multidrug resistance protein MexB                                                 | Response to antibiotic                  | 0.035 | 0.014 | 0.017 | 0.001 | 0.021 |
| P78966 | Mating factor M secretion protein mam1                                            | Transmembrane transport                 | 0.035 | 0.000 | 0.00  | 0.003 | 0.00  |
| Q6D2B1 | Multidrug resistance protein MdtB                                                 | Transporter activity                    | 0.011 | 0.01  | 0.00  | 0.003 | 0.01  |
| Q73V87 | Multidrug resistance protein mmr                                                  | Response to antibiotic                  | 0.035 | 0.00  | 0.017 | 0.001 | 0.01  |
| P34713 | Multidrug resistance protein PGP3                                                 | Response to antibiotic                  | 0.035 | 0.014 | 0.000 | 0.00  | 0.00  |
| Q1GR76 | UPP (Bacitracin resistance protein) (Undecaprenyl pyrophosphate phosphatase) UPPP | Response to antibiotic                  | 0.070 | 0.029 | 0.051 | 0.003 | 0.032 |

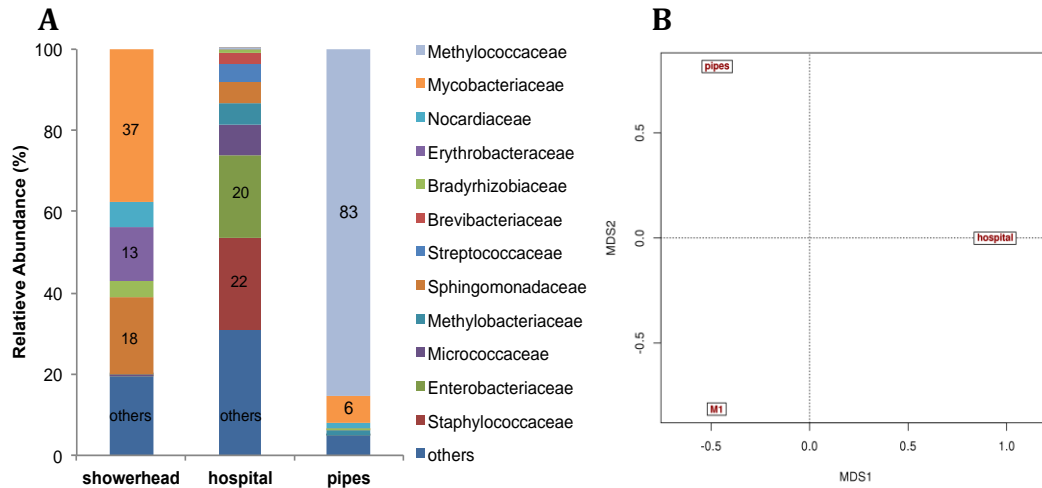

**Figure S1. Comparison of the taxonomic profile of the shower hose metagenome with other microbial communities at the family level.** (A) The bacterial community structures were assessed using 16S rRNA gene-encoding metagenomic reads. The dataset called “Hospital” was collected from an ICU ward surface of the University Hospital A Coruña, Spain, (SRA ID: SRX099356). The dataset called “Pipes” was collected from drinking water pipes in Florida, USA (SRA ID: SRX472092). (B) Multidimensional scaling (MDS) plot based on the relative abundance of taxa on each dataset using the Bray–Curtis distance.

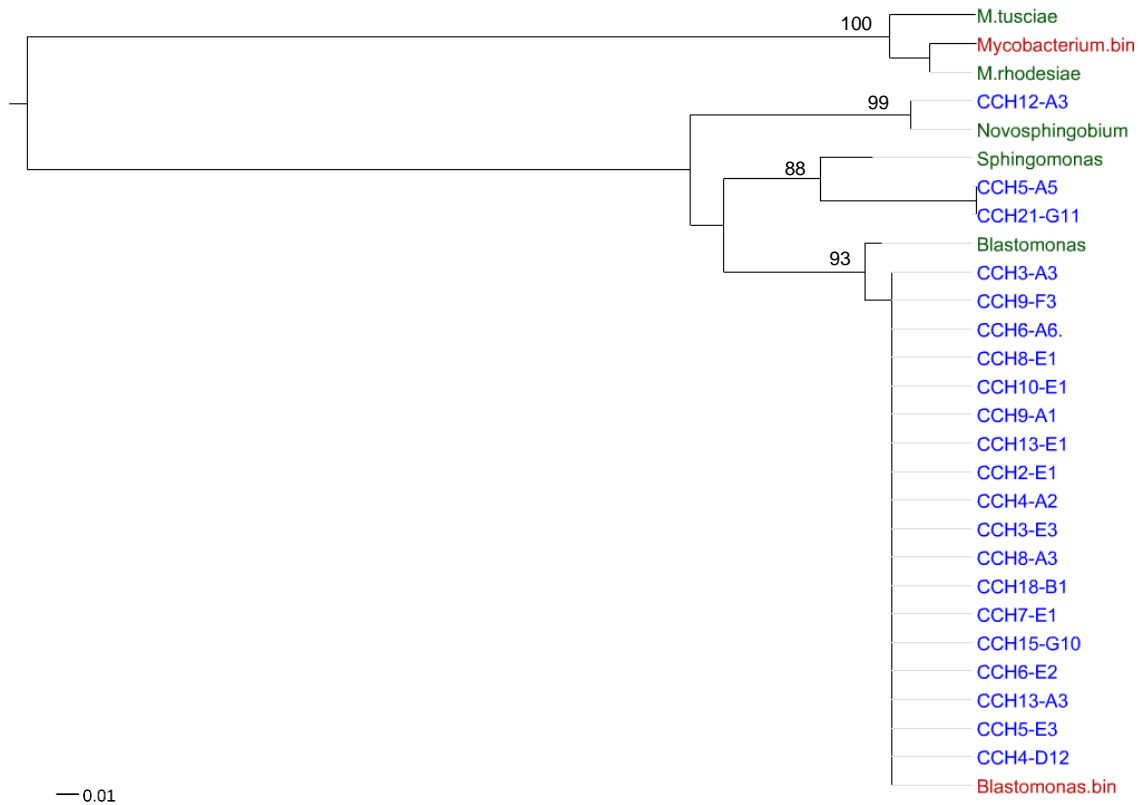

**Figure S2. Phylogenetic relationships among population bins and isolate genomes based on 30S ribosomal protein S20 sequences.** The isolates from the shower hoses are colored in blue; the recovered bins in red, and the reference genomes in green. The phylogeny was generated using the Neighbor-joining algorithm with 1000 bootstrap replicates using MEGA V.5. The number at nodes indicates the bootstrap support. Scale bar represents substitutions per site.

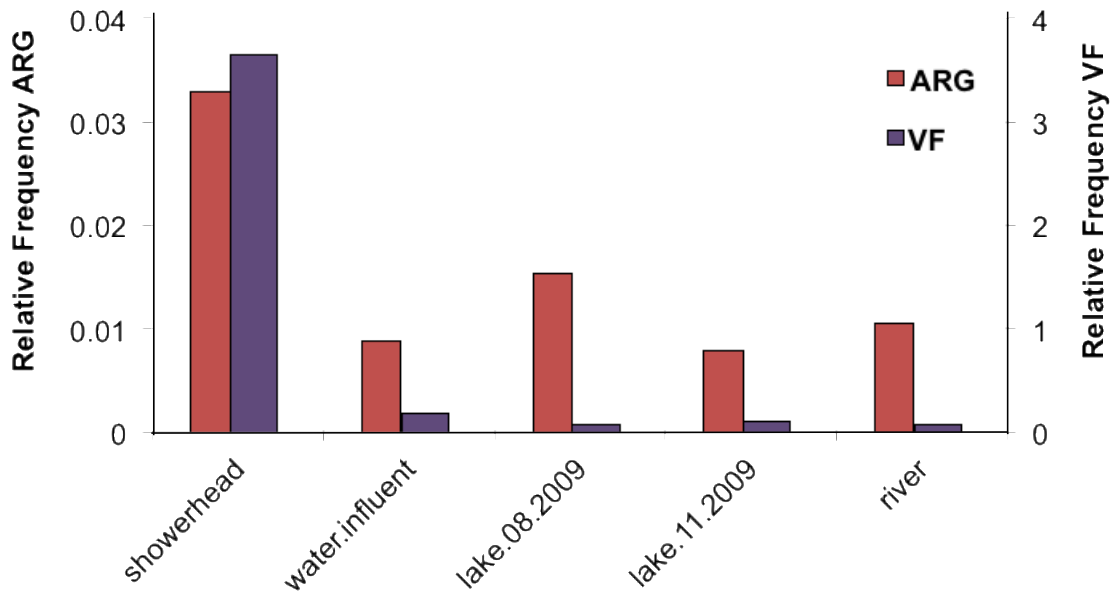

**Figure S3. Metagenomic comparison of the genes involved in antibiotic resistance (ARG) and virulence (VF) mechanisms between the shower hose and other water-associated microbial communities.** The “river” dataset corresponds to samples from river water (SRA ID: SRR1022353), the “drinking.water” dataset from a drinking water treatment plant in China (SRA ID: SRR835363), the “lake.08.2009” dataset collected during summertime (SRA ID: SRR096386), and the “lake.11.2009” dataset collected during falltime (SRA ID: SRR096389) from Lake Lanier in Georgia, USA (3). Pearson's Chi-squared test values between the shower hose metagenome and each water metagenome were significant (p-value < 0.05).

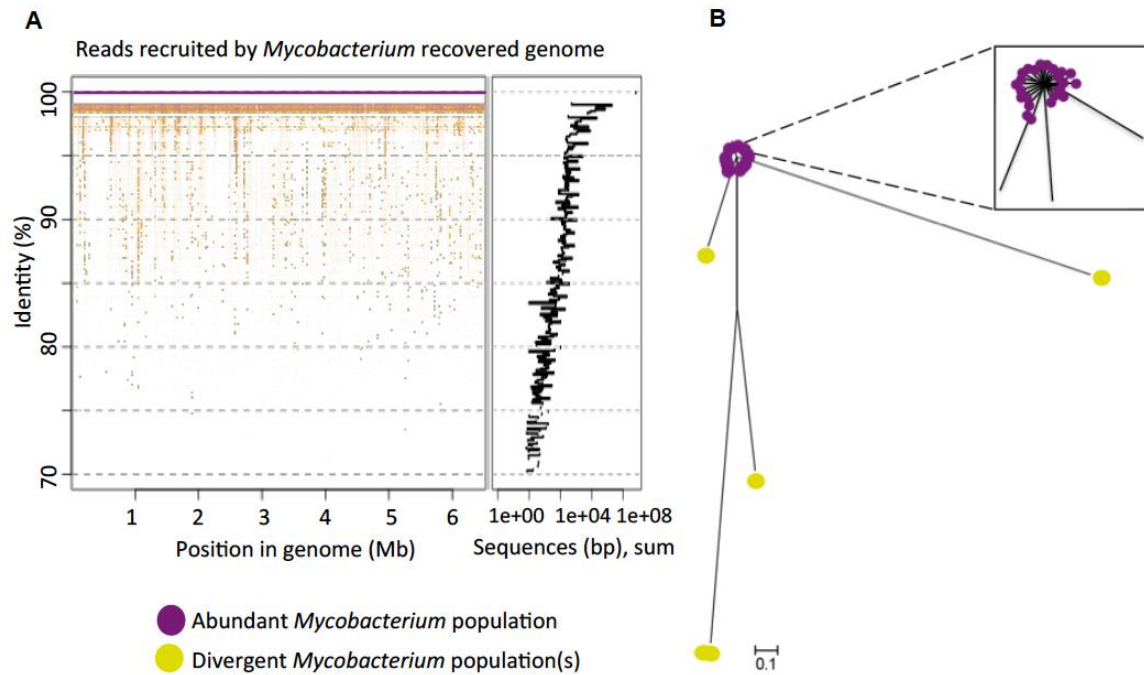

**Fig S4. Intra-population diversity of the abundant *Mycobacterium* population recovered from the shower hose metagenomes.** (A) Fragment recruitment plot of the recovered *Mycobacterium* population versus the M1 metagenome. Metagenomic reads were searched against the recovered genome sequence using a cut-off of at least 70% nucleotide identity and complete alignment to the genome reference. The y-axis corresponds to the identity of each read and the x-axis to the position of the read mapped on the genome. The histogram on the right represents the sum of the total base pairs of the reads recruited per unit of nucleotide identity. (B) Neighbor-joining phylogenetic tree of metagenomic reads that mapped on the single-copy 30S ribosomal protein S9 encoded on the recovered genome. Inset represents a zoomed in view of the tree where the reads representing the abundant *Mycobacterium* sp. population clustered together (in purple color). Note the star-like phylogeny formed by the latter reads. Scale bar represents substitutions per site.

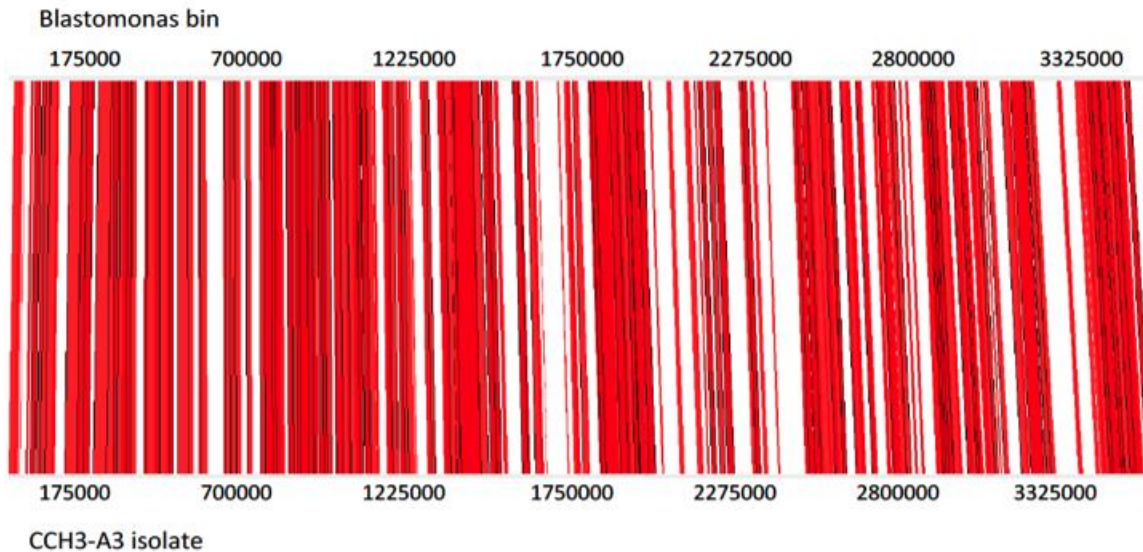

**Figure S5. Genome alignment of the (binned) *Blastomonas* population genome against the *Blastomonas* isolate genome.** The Artemis Comparison Tool (ACT) (4) was used to visualize the alignment of the two genomes. Contigs of the *Blastomonas* bin (top) were ordered based on homology searches and (assumed) synteny with a *Blastomonas* isolate genome available in GenBank (Accession number: GCA\_000331245.1). Red bars indicate regions of similarity with the same orientation; empty/white bars indicate regions of gene content differences. Note, however, that most of the gene-content differences probably represent sequencing gaps (e.g., neither genome was complete) as opposed to real gene-content differences.



## REFERENCES CITED

1. **Chen L, Xiong Z, Sun L, Yang J, Jin Q.** 2012. VFDB 2012 update: toward the genetic diversity and molecular evolution of bacterial virulence factors. *Nucleic acids research* **40**:D641-645.
2. **Wattam AR, Abraham D, Dalay O, Disz TL, Driscoll T, Gabbard JL, Gillespie JJ, Gough R, Hix D, Kenyon R, Machi D, Mao C, Nordberg EK, Olson R, Overbeek R, Pusch GD, Shukla M, Schulman J, Stevens RL, Sullivan DE, Vonstein V, Warren A, Will R, Wilson MJ, Yoo HS, Zhang C, Zhang Y, Sobral BW.** 2014. PATRIC, the bacterial bioinformatics database and analysis resource. *Nucleic acids research* **42**:D581-591.
3. **Oh S, Caro-Quintero A, Tsementzi D, DeLeon-Rodriguez N, Luo C, Poretsky R, Konstantinidis KT.** 2011. Metagenomic insights into the evolution, function, and complexity of the planktonic microbial community of Lake Lanier, a temperate freshwater ecosystem. *Applied and environmental microbiology* **77**:6000-6011.
4. **Rutherford K, Parkhill J, Crook J, Horsnell T, Rice P, Rajandream MA, Barrell B.** 2000. Artemis: sequence visualization and annotation. *Bioinformatics* **16**:944-945.
